# Supplementary material for: Emergency Use and Efficacy of an Asynchronous Teledermatology System as a Novel Tool for Early Diagnosis of Skin Cancer during the First Wave of COVID-19 Pandemic
Source: MDPI journal article supplement (doi:10.3390/ijerph19052699), 2022-02-25
Supplement: s1 [file s1]

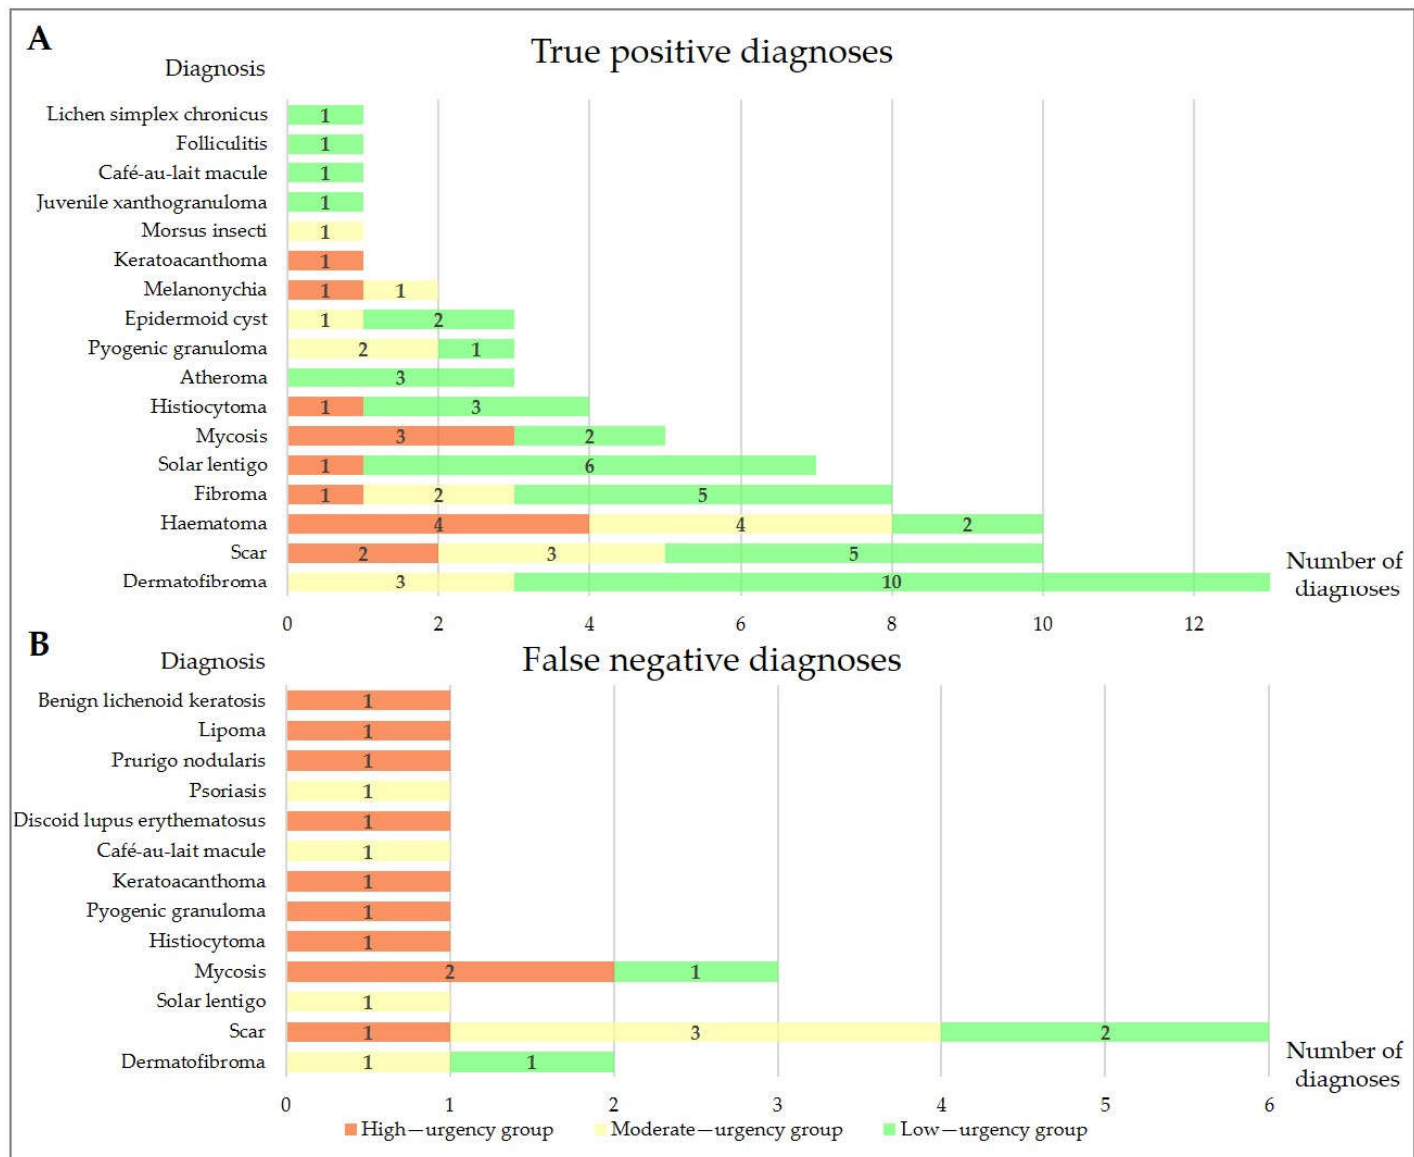

**Figure S1.** Distribution of different triage groups among true positive (**Panel A**) and false negative diagnoses (**Panel B**) of Other lesions, considering aggregated diagnosis of the lesions during teledermatology consultations.
